# Supplementary material for: Death and Emergency Readmission of Infants Discharged After Interventions for Congenital Heart Disease: A National Study of 7643 Infants to Inform Service Improvement
Source: PubMed Central journal article supplement — J Am Heart Assoc. 2016 May 20;5(5):e003369. doi: 10.1161/JAHA.116.003369 (PMC4889202; doi:10.1161/jaha.116.003369), 2016-05-20
Supplement: JAH3-5-e003369-s001.pdf [file JAH3-5-e003369-s001.pdf]

## SUPPLEMENTAL MATERIAL

### Data S1. Supplemental Methods

#### Specific procedure hierarchy and groupings

Within the NCHDA dataset, each procedure is described by up to 8 individual procedural International Paediatric and Congenital Cardiac Codes (IPCCCs) [1]. An algorithm developed by the NCHDA Steering Committee links the individual IPCCCs for a given record to 1 of 56 *specific procedures*, i.e. reported surgical operations or transcatheter procedures. Note that the hierarchical system is shown here in its entirety for reference purposes. It is designed for children of any age and many procedures listed would be rarely if ever performed in infancy.

The algorithm imposes a hierarchy with the record assigned the most complex specific procedure consistent with the collection of codes recorded. Approximately 85% of procedures fall into one of these 56 specific procedures. For children that had more than one procedure during their index admission, their index intervention was chosen to be the most complex according to the NCHDA specific procedure hierarchy.

For reasons of model reliability and validity of predictive discrimination, the index specific procedures were aggregated into three procedural groups considered clinically meaningful to the focus of the study: definitive, staged and ungrouped. A definitive procedure would be expected to be the final, often only, operation in achieving a biventricular or functionally univentricular circulation, although acknowledging that later procedures may be required in an individual's lifetime, such as conduit or valve replacement. A staged procedure would be undertaken in the expectation that further operations would be expected to achieve either a definitive biventricular circulation or definitive univentricular repair with a Fontan-type operation in early childhood.

| Specific procedure                                                            | NCHDA hierarchy | Procedure group |
|-------------------------------------------------------------------------------|-----------------|-----------------|
| Norwood                                                                       | 1               | Staged          |
| <i>Heart Transplant</i>                                                       | 2               | <i>Excluded</i> |
| Totally anomalous pulmonary venous connection (TAPVC) Repair + Arterial Shunt | 3               | Staged          |
| Fontan procedure <sup>†</sup>                                                 | 4               | Staged          |
| Bidirectional cavopulmonary shunt                                             | 5               | Staged          |
| Senning or Mustard procedure                                                  | 6               | Staged          |
| Truncus and interruption repair                                               | 7               | Definitive      |
| Truncus arteriosus repair                                                     | 8               | Definitive      |
| Tricuspid valve replacement                                                   | 9               | Ungrouped       |
| Interrupted aortic arch repair                                                | 10              | Definitive      |
| Multiple ventricular septal defect (VSD) closure                              | 11              | Definitive      |
| Mitral valve replacement                                                      | 12              | Definitive      |
| Repair of TAPVC                                                               | 13              | Definitive      |
| Atrioventricular septal defect and tetralogy repair                           | 14              | Definitive      |
| Atrioventricular septal defect (complete) repair                              | 15              | Definitive      |
| Atrioventricular septal defect (partial) repair                               | 16              | Definitive      |
| Aortic valvotomy (surgical)                                                   | 17              | Definitive      |
| Aortic valvoplasty                                                            | 18              | Definitive      |

|                                                                   |    |                 |
|-------------------------------------------------------------------|----|-----------------|
| Anomalous coronary artery repair                                  | 19 | Definitive      |
| Cor triatriatum repair                                            | 20 | Definitive      |
| Arterial switch + VSD closure                                     | 21 | Definitive      |
| Arterial switch (for isolated transposition)                      | 22 | Definitive      |
| Pulmonary atresia & VSD repair                                    | 23 | Definitive      |
| Pulmonary valve replacement                                       | 24 | Definitive      |
| Tetralogy with absent pulmonary valve repair                      | 25 | Definitive      |
| Tetralogy repair                                                  | 26 | Definitive      |
| Isolated coarctation repair                                       | 27 | Definitive      |
| Aortic Valve Replacement - non Ross                               | 28 | Definitive      |
| Supravalvar aortic stenosis repair                                | 29 | Definitive      |
| Rastelli procedure                                                | 30 | Definitive      |
| Aortic valve replacement - Ross                                   | 31 | Definitive      |
| Aortic root replacement (not Ross)                                | 32 | Definitive      |
| Subvalvar aortic stenosis repair                                  | 33 | Definitive      |
| Aortopulmonary window repair                                      | 34 | Definitive      |
| Atrial septal defect (ASD) repair                                 | 35 | Definitive      |
| VSD Repair                                                        | 36 | Definitive      |
| Arterial shunt                                                    | 37 | Staged          |
| Isolated Pulmonary artery band                                    | 38 | Staged          |
| Patent ductus arteriosus (PDA) ligation (surgical)                | 39 | Definitive      |
| <i>Transcatheter pulmonary valve replacement *</i>                | 40 | <i>Excluded</i> |
| <i>VSD closure (catheter) *</i>                                   | 41 | <i>Excluded</i> |
| Aortic balloon valvotomy                                          | 42 | Definitive      |
| Coarctation angioplasty                                           | 43 | Definitive      |
| <i>Pulmonary artery stenting *</i>                                | 44 | <i>Excluded</i> |
| <i>ASD closure (catheter) *</i>                                   | 45 | <i>Excluded</i> |
| PDA closure (catheter)                                            | 46 | Definitive      |
| <i>Recoarctation angioplasty *</i>                                | 47 | <i>Excluded</i> |
| Pulmonary balloon valvoplasty                                     | 48 | Definitive      |
| <i>Blade atrial septostomy *</i>                                  | 49 | <i>Excluded</i> |
| Coarctation stenting                                              | 50 | Definitive      |
| <i>PFO closure (catheter) *</i>                                   | 51 | <i>Excluded</i> |
| Pulmonary valvotomy (radiofrequency)                              | 52 | Definitive      |
| Duct Stenting                                                     | 53 | Staged          |
| RVOT Stenting                                                     | 54 | Staged          |
| <i>Radiofrequency ablation for supraventricular tachycardia *</i> | 55 | <i>Excluded</i> |
| <i>Implantable Cardioverter Defibrillator *</i>                   | 56 | <i>Excluded</i> |
| <i>Minor and Excluded Procedures *</i>                            | 57 | <i>Excluded</i> |
| Not a specific procedure: surgical **                             | 58 | Ungrouped       |
| <i>Not a specific procedure: catheter *</i>                       | 59 | <i>Excluded</i> |

\* Catheter procedure excluded from analysis

\*\* Note that n=53 out of 231 children with a cardiac diagnosis of aortic arch obstruction +/- VSD/ASD and no index specific procedure had either a banding of pulmonary trunk or pulmonary trunk band removal and were therefore classified as a “staged” procedure group rather than “ungrouped”.

† Only one patient in our infant cohort had a Fontan as their index procedure.

## Candidate patient risk factors

Potential non-medical, pre-procedure or post-procedure risk factors available in the patient-based analysis dataset that would be known at the point of discharge were pre-specified (Supplemental Table 1). Some variables were simplified prior to the statistical analyses in order to reduce the number of values (degrees of freedom) in the model and hence the risk of overfitting (see Harrell [2]). An appropriate power calculation was performed. The origin of each risk factor (either the PICA Net or NCHDA dataset) is noted in Supplemental Table 1. Where both audits contained information on a particular risk factor, the most complete source was used or, in the case of ethnicity, a combination of the two sources (see Supplemental Table 1).

### Non-medical variables

Deprivation was based on the residential address at admission and defined using quintiles of the English Index of Multiple Deprivation 2010 (IMD), which is calculated at the level of small (~ 1,500 people) geographic areas covering England [3].

Ethnicity information is recorded in both audits, with NCHDA using a bespoke classification scheme and PICA Net using the Census 2001 classification used by the Office for National Statistics (ONS) [4]. PICA Net was the primary source for our ethnicity variable due to its comparability with population statistics and was collapsed into seven groups to improve model stability: white, mixed, Asian, black, Chinese, other, and not stated. Where ethnic group was not available from PICA Net, the NCHDA ethnic code was used to assign white, Asian or black ethnicity (which showed strong concordance across the two audits) but not to assign Chinese, other or mixed ethnicity (which showed poorer concordance) [5]. The most frequently recorded ethnic group was assigned to the child if they had multiple admission records.

### Pre-procedure variables

#### *Cardiac diagnoses and procedure information*

Within the NCHDA dataset, each record (interventional procedure) can be described by up to 6 individual diagnostic International Paediatric and Congenital Cardiac Codes (IPCCCs). The combination of these can be mapped to 1 of 24 primary cardiac diagnoses using a hierarchical scheme developed by Brown *et al.* [6]. For the purposes of this study, this mapping scheme was implemented with two minor adjustments (see Supplemental Table 2): a new category of ‘arrhythmia’ was created (ranked 24<sup>th</sup> in the modified hierarchy) and the “miscellaneous congenital” diagnostic category was split into “major miscellaneous diagnoses” (ranked 9<sup>th</sup> in the modified hierarchy) and “minor miscellaneous diagnoses” (ranked 25<sup>th</sup> in the modified hierarchy).

To reduce the risk of overfitting in the model, we grouped the diagnostic categories into four cardiac diagnosis groups (see Supplemental Table 2): Hypoplastic left heart syndrome (HLHS); Functionally univentricular heart (UVH) or pulmonary atresia (PA) with an intact ventricular septum (IVS); Ventricular septal defect (VSD) and; “Other” (the remaining 22 diagnosis categories). The choice of diagnosis group ‘HLHS’ reflects the body of literature related to ‘inter-stage’ deaths in this population. A separate group of ‘UVH or PA+IVS’ was chosen due to the high-risk nature of these conditions, which are often systemic-to-pulmonary arterial shunt dependent, with a view to distinguishing these from HLHS patients. Of the remaining cardiac diagnosis groups, we elected to review the VSD group separately as a recognizable bi-ventricular comparator group in order for us to evaluate the face validity of comparisons between HLHS or UVH/PA+IVS and the much larger, less homogeneous group of mainly biventricular diagnoses.

In addition to their overall primary cardiac diagnosis, each child was identified as having an acquired cardiac diagnosis if any of their records included an IPCCC diagnostic code mapping to this category, for example, ventricular dysfunction and ventricular hypoplasia. Some non-cardiac IPCCC diagnostic codes were identified as post-procedural morbidities (see below and Supplemental Table 4 for details).

The index (specific) procedures were aggregated into three groups (see above for mappings): Palliative (e.g. Norwood, bidirectional cavopulmonary shunt, arterial shunt), Corrective (e.g. truncus arteriosus repair, atrioventricular septal defect complete repair, tetralogy repair) or “Ungrouped” (if no specific procedure was assigned).

#### *Non-cardiac diagnosis and co-morbidity information*

Non-cardiac diagnosis and co-morbidity information was primarily sourced from PICA Net, in which any given PICU admission can record up to 24 clinical Read codes [7]. As 3,325 discrete Read codes were present in the dataset, we developed a new scheme linking each code to 1 of 16 system-based categories (see Supplemental Table 3).

*Congenital anomaly:* If any PICU admission within the index admission contained a Read code for a congenital anomaly then the child was assigned this attribute. Many of these children had Downs syndrome, however other syndromes that are often associated with cardiac defects were also often represented, including DiGeorge syndrome (22q11 deletion). Non-syndromic congenital anomalies were also described, including urogenital/renal malformations, tracheal/trachea-oesophageal malformations, vision/hearing deficits and exomphalos/gastrointestinal malformations. These are major anomalies, some requiring neonatal surgery, and their impact is likely to be life-long.

*Neurodevelopmental condition:* If any Read code within the index admission was linked to the neurodevelopmental category then the child was assigned this attribute. These comprised a range acquired and congenital conditions most with global effects on the central nervous system and likely to have lifelong impact, the most common examples being (in order of decreasing frequency): epilepsy/seizures, developmental delay, sleep apnoea, hydrocephalus, retinopathy of prematurity, stroke, hemiparesis/hemiplegia, anoxic encephalopathy, cerebral venous sinus thrombosis and cerebral palsy. Within the analysis dataset, n= 95 children were coded as having developmental delay, of which n=64 had no other neurodevelopmental problem coded. On closer inspection of these n=64 children, 41% had a congenital anomaly or syndrome (e.g. Down’s syndrome, DiGeorge syndrome, craniosynostosis, microcephaly) or a comorbidity (e.g. meningitis, preterm birth, brain injury) that could be associated with developmental delay. The remaining 59% had no record of a comorbidity associated with developmental delay but since coding is not comprehensive (e.g. preterm children were not always recorded as such), it is possible that these are nonetheless correct and were used where a degree of neurodevelopmental delay was evident even within infancy.

*Prematurity:* Finally, a child was assigned the attribute of prematurity (<37 completed weeks gestation) if they had a Read code for this in any admission.

#### *Additional pre-procedure factors*

Additional pre-procedure factors considered on the basis of potential clinical relevance were: Gender; Age at procedure; Weight-for-age at procedure (calculated using WHO reference standards [7]); Antenatal diagnosis, Clinical deterioration prior to the index intervention (assigned if the index admission or any prior PICU admissions were urgent and unplanned).

#### Post-procedure variables

Post-procedure patient variables known at hospital discharge were: Length of stay for the index admission; Requirement for renal support (including dialysis and haemofiltration) or extracorporeal

membrane oxygenation support (ECMO) during the index admission; Any adverse ICU events during the index admission (assigned if any PICU admission contained a Read code for: collapse or cardiac arrest, acquired injury or complications, or a non-cardiac operation (categories 9-11 in Supplemental Table 3)); Whether the index admission was associated with any acquired co-morbidities (categories 1-8 in Supplemental Table 3); Whether the index admission was associated with any post-procedural morbidity (Supplemental Table 4); Any catheter or surgical procedures performed during the index admission in addition to the index procedure (either before or after the index procedure).

**Table S1: Summary of candidate patient risk factors**

Descriptions of the pre-specified potential risk factors considered in the analysis, including whether a given variable relates to the index procedure, index admission or is a characteristic of the child, its possible values and the source dataset (PICANet or NCHDA). All variables would be known at the point of discharge and are grouped according to whether they are a non-medical, pre-procedure or post- procedure factor.

| Pre-specified candidate risk factor | Description                                                                                                                                                                                                                                | Variable level  | Values                                                 | Source dataset       |
|-------------------------------------|--------------------------------------------------------------------------------------------------------------------------------------------------------------------------------------------------------------------------------------------|-----------------|--------------------------------------------------------|----------------------|
| <b>Non-medical</b>                  |                                                                                                                                                                                                                                            |                 |                                                        |                      |
| Deprivation                         | Quintiles of the English Index of Multiple Deprivation 2010 [2] as recorded for the index procedure.                                                                                                                                       | Child           | 1-5 (1 most deprived, 5 least deprived)                | NCHDA                |
| Ethnicity                           | Census 2001 classification used by ONS [3], collapsed into seven groups. Most frequently recorded ethnic group if child had multiple records.                                                                                              | Child           | White, Mixed, Asian, Black, Chinese, Other, Not stated | PICANet <sup>†</sup> |
| <b>Pre-procedure</b>                |                                                                                                                                                                                                                                            |                 |                                                        |                      |
| Cardiac diagnosis group             | Aggregated groupings of the cardiac diagnosis categories assigned through application of a modified version of the hierarchical mapping scheme developed by Brown <i>et al.</i> [5] across all cardiac records for a child (see Table A2). | Child           | VSD, HLHS, UVH/PA+IVS, Other                           | NCHDA                |
| Acquired cardiac diagnosis          | Assigned if any cardiac record in the index admission had an IPCCC diagnostic code corresponding to the acquired cardiac diagnosis category (see Table A2).                                                                                | Index admission | Yes, No                                                | NCHDA                |
| Specific procedure group            | Aggregated groupings of the index specific procedures assigned through application of the NCHDA specific procedure hierarchy across all interventions within the index admission (see Appendix 1).                                         | Index procedure | Corrective, palliative, ungrouped                      | NCHDA                |
| Congenital anomaly                  | Assigned if any PICU record during the index admission contained a Read code corresponding to the congenital anomaly category.                                                                                                             | Index admission | Yes, No,                                               | PICANet              |
| Neurodevelopment condition          | Assigned if any PICU record during the index admission contained a Read code corresponding to the neurodevelopmental category.                                                                                                             | Index admission | Yes, No                                                | PICANet              |
| Prematurity                         | Assigned if any PICU record for the child contained a Read code corresponding to prematurity or preterm birth (see Table A3).                                                                                                              | Child           | Yes, No, Missing                                       | PICANet              |
| Gender                              | Most frequently occurring gender across all cardiac records for a patient (or gender at index procedure if tied).                                                                                                                          | Child           | Male, Female                                           | NCHDA                |
| Age at index procedure              | Age recorded in cardiac record for the index procedure.                                                                                                                                                                                    | Index procedure | Continuous variable                                    | NCHDA                |

|                        |                                                                                                                                   |                 |                     |         |
|------------------------|-----------------------------------------------------------------------------------------------------------------------------------|-----------------|---------------------|---------|
| Weight-for-age z-score | Standardised weight-for-age at index procedure, calculated from index procedure weight and age using WHO reference standards [6]. | Index procedure | Continuous variable | NCHDA   |
| Antenatal diagnosis    | Assigned if coded in any cardiac record for the child.                                                                            | Child           | Yes, No, Missing    | NCHDA   |
| Clinical deterioration | Assigned if any PICU admissions prior to discharge from the index admission were urgent and unplanned.                            | Index admission | Yes, No             | PICANet |

### Post-procedure

|                                |                                                                                                                                                                                                                               |                 |                     |                 |
|--------------------------------|-------------------------------------------------------------------------------------------------------------------------------------------------------------------------------------------------------------------------------|-----------------|---------------------|-----------------|
| Length of stay                 | The length in days of the continuous period as in-patient within a specialist paediatric cardiac hospital or PICU that surrounds a child's first interventional cardiac procedure in infancy.                                 | Index admission | Continuous variable | NCHDA & PICANet |
| Need for renal support         | Assigned if any PICU record within the index admission indicated renal support was required (including dialysis and haemofiltration).                                                                                         | Index admission | Yes, No, Missing    | PICANet         |
| Need for ECMO                  | Assigned if any PICU record within the index admission indicated ECMO support was required.                                                                                                                                   | Index admission | Yes, No, Missing    | PICANet         |
| Acquired comorbidity           | Assigned if any PICU record during the index admission contained a Read code identified an acquired condition (categories 1-8 in Table A3).                                                                                   | Index admission | Yes, No, Missing    | PICANet         |
| Adverse event in PICU          | Assigned if any PICU record during the index admission contained a Read code corresponding to collapse or cardiac arrest, acquired injury or complications, or a non-cardiac operation in PICU (categories 9-11 in Table A3). | Index admission | Yes, No, Missing    | PICANet         |
| Post-procedural morbidity      | Assigned if any cardiac record during the index admission contained an IPCCC code identified as a post-procedural morbidity (see Table A4).                                                                                   | Index admission | Yes, No             | NCHDA           |
| Additional surgical procedures | Assigned if any surgical procedures were performed during the index admission in addition to the index procedure (before or after).                                                                                           | Index admission | Yes, No             | NCHDA           |
| Additional catheter procedures | Assigned if any catheter procedures were performed during the index admission in addition to the index procedure (before or after).                                                                                           | Index admission | Yes, No             | NCHDA           |

ONS = Office for National Statistics; PICU = paediatric intensive care unit; NCHDA = National Congenital Heart Disease Audit; PICANet = Paediatric Intensive Care Audit Network; IPCCC = International Paediatric and Congenital Cardiac Code; ECMO = extracorporeal membrane oxygenation; HLHS = hypoplastic left heart syndrome; UVH = functionally univentricular heart; PA+IVS = pulmonary atresia with intact ventricular septum; VSD = Ventricular septal defect.

<sup>†</sup> Where ethnic group was not available from PICANet, the NCHDA ethnic code was used to assign white, Asian or black ethnicity (which showed strong concordance across the two audits) but not to assign Chinese, other or mixed ethnicity (which showed poorer concordance).

**Table S2: Primary cardiac diagnosis hierarchy and collapsed groupings**

The hierarchy used to assign a primary cardiac diagnosis category to each child in the analysis dataset (modified from scheme developed by Brown *et al.*[5]), along with the mappings from diagnosis category to cardiac diagnosis group (the candidate patient risk factor used in the analyses).

| Primary cardiac diagnosis category                                              | Hierarchy rank <sup>†</sup> | Cardiac diagnosis group <sup>††</sup> |
|---------------------------------------------------------------------------------|-----------------------------|---------------------------------------|
| Hypoplastic left heart syndrome                                                 | 1                           | HLHS                                  |
| Functionally univentricular heart                                               | 2                           | UVH or PA+IVS                         |
| Common arterial trunk (truncus arteriosus)                                      | 3                           | Other                                 |
| TGA + VSD/DORV-TGA type                                                         | 4                           | Other                                 |
| Interrupted aortic arch                                                         | 5                           | Other                                 |
| TGA (concordant AV and discordant VA connections) and intact ventricular septum | 6                           | Other                                 |
| PA with an intact ventricular septum                                            | 7                           | UVH or PA+IVS                         |
| Pulmonary atresia + VSD (including Fallot type)                                 | 8                           | Other                                 |
| Miscellaneous congenital primary diagnoses                                      | 9                           | Other                                 |
| Atrioventricular septal defect                                                  | 10                          | Other                                 |
| Fallot/DORV-Fallot type                                                         | 11                          | Other                                 |
| Aortic valve stenosis (isolated)                                                | 12                          | Other                                 |
| Tricuspid valve abnormality (including Ebstein's)                               | 13                          | Other                                 |
| Mitral valve abnormality (including supra-valvar, sub-valvar)                   | 14                          | Other                                 |
| Totally anomalous pulmonary venous connection                                   | 15                          | Other                                 |
| Aortic arch obstruction +/- VSD/ASD                                             | 16                          | Other                                 |
| Pulmonary stenosis                                                              | 17                          | Other                                 |
| Subaortic stenosis (isolated)                                                   | 18                          | Other                                 |
| Aortic regurgitation                                                            | 19                          | Other                                 |
| Isolated VSD +/- ASD +/- PDA                                                    | 20                          | VSD                                   |
| Interatrial communication (ASD)                                                 | 21                          | Other                                 |
| Patent ductus arteriosus (PDA)                                                  | 22                          | Other                                 |
| Acquired non-congenital heart disease                                           | 23                          | Other                                 |
| Arrhythmia                                                                      | 24                          | Other                                 |
| Miscellaneous congenital terms                                                  | 25                          | Other                                 |
| Noncardiac or uncoded diagnosis                                                 | 26                          | Other                                 |

TGA = transposition of the great arteries; VSD = ventricular septal defect; DORV = double outlet right ventricle; AV = atrioventricular; VA = ventriculoarterial; ASD = atrial septal defect.

<sup>†</sup> The hierarchical scheme developed by Brown *et al.*[5], modified for the purposes of this study with two minor adjustments: creating a new category of 'arrhythmia' and splitting the original "miscellaneous congenital" diagnostic category into "major miscellaneous diagnoses" and "minor miscellaneous diagnoses".

<sup>††</sup> For reasons of model reliability and validity of predictive discrimination, we grouped the diagnostic categories into four cardiac diagnosis groups considered clinically meaningful to the study focus: Hypoplastic left heart syndrome (HLHS); Functionally univentricular heart (UVH) or pulmonary atresia with an intact ventricular septum (PA+IVS); Ventricular septal defect (VSD); "Other".



**Table S3: Coding scheme for non-cardiac diagnoses and comorbidities**

A new scheme developed and implemented in this work to link each Read code [6] to at most 1 of 16 system-based categories. Given the large number of codes, we present exemplars within each of categories rather than the extensive list: further details are available from authors on request. We note that congenital heart disease/cardiac procedure Read codes in PICANet were not included as a category as they were inconsistently recorded. Cardiac diagnostic and procedure codes for the analysis were derived from the NCHDA dataset only.

|    | Category                                                                                                                                            | Number of codes | Examples of included clinical conditions                                               |
|----|-----------------------------------------------------------------------------------------------------------------------------------------------------|-----------------|----------------------------------------------------------------------------------------|
| 1  | Acquired endocrine, nutritional and metabolic conditions                                                                                            | 82              | Diabetes mellitus; alpha-1-antitrypsin disorder; rickets; failure to thrive            |
| 2  | Acquired gastrointestinal (digestive system) conditions                                                                                             | 166             | Gastritis; constipation; liver failure; hernia; jaundice; perianal fistula             |
| 3  | Acquired infections (in any system except respiratory infections which are included within the category for acquired respiratory system conditions) | 144             | Cytomegalovirus; E coli infection; MRSA; meningitis; otitis media; wound abscess       |
| 4  | Conditions related to haematology, oncology or immunology, which may be acquired or congenital.                                                     | 97              | Acute myeloid leukaemia; Factor VIII deficiency; teratoma; sickle cell anaemia         |
| 5  | Acquired musculoskeletal, connective tissue or skin conditions                                                                                      | 29              | Atopic dermatitis; scoliosis; systemic onset juvenile chronic arthritis                |
| 6  | Acquired genitourinary system conditions                                                                                                            | 42              | Acute renal failure; hydronephrosis; rectovaginal fistula                              |
| 7  | Acquired respiratory system conditions                                                                                                              | 229             | Stridor; asthma; bronchiolitis; pulmonary oedema; pneumonia; haemothorax               |
| 8  | Conditions originating in or specific to the perinatal period                                                                                       | 109             | Birth asphyxia; gestational diabetes; meconium ileus; shoulder dystocia                |
| 9  | Non-cardiac intervention or operation, excluding procedures that are part of routine intensive care                                                 | 478             | Adenoidectomy; bone marrow transplant; splenectomy; plication of diaphragm             |
| 10 | Collapse or cardiac arrest                                                                                                                          | 14              | Cardiac arrest; hypovolaemic shock; fainting; respiratory arrest                       |
| 11 | Acquired injury or complication of surgery/other condition                                                                                          | 145             | Brain injury; anaesthetic shock; closed rib fracture; vocal cord palsy; limb ischaemia |
| 12 | Congenital anomalies (all severity)                                                                                                                 | 342             | Trisomy 18; Pierre-Robin syndrome; cleft palate; club foot; oesophageal atresia        |
| 13 | Neurological or neurodevelopmental conditions – may be congenital or acquired                                                                       | 126             | Cataract, cerebral palsy; autistic spectrum disorder; epilepsy; optic atrophy          |
| 14 | Additional codes which are non-specific or do not have standardised coding                                                                          | 429             | e.g. family history of hypothyroidism; child in foster care; central line feeding;     |
| 15 | Premature birth (<37 completed weeks gestation)                                                                                                     | 11              | Baby born premature/very premature                                                     |
| 16 | Supportive procedures                                                                                                                               | 7               | Extracorporeal membrane oxygenation (ECMO); ventricular assist device                  |

**Table S4: Post-procedural morbidities**

Some non-cardiac diagnostic International Paediatric and Congenital Cardiac Codes (IPCCC) were identified as post-procedural morbidities as set out in the table below. If any NCHDA record during the index admission period for a child contained an IPCCC corresponding to a post-procedural morbidity then their index admission was flagged as having a post-procedural morbidity.

| <b>IPCCC identified as post-procedural morbidities</b>                           |
|----------------------------------------------------------------------------------|
| 160101. Pneumothorax                                                             |
| 160104. Pleural effusion                                                         |
| 160107. Chylothorax                                                              |
| 100811. Postpericardiotomy syndrome                                              |
| 110412. Junctional ectopic tachycardia (His bundle): post-op                     |
| 110617. Postprocedural complete AV block                                         |
| 110632. Procedure related complete AV block requiring temporary pacing           |
| 110633. Procedure related complete AV block requiring permanent pacemaker system |
| 150001. Cardiac arrest during procedure                                          |
| 150002. Cardiac arrest following procedure                                       |
| 150003. Postprocedural low cardiac output                                        |
| 150005. Myocardial infarction following procedure                                |
| 150009. Postprocedural requirement for mechanical circulatory support            |
| 150030. Postprocedural hypovolaemia                                              |
| 150200. Postprocedural haemorrhage                                               |
| 150203. Postprocedural coagulopathy                                              |
| 150207. Postprocedural haemolysis                                                |
| 150265. Postprocedural haemorrhage requiring reoperation                         |
| 150300. Median sternotomy complication                                           |
| 150303. Infection of median sternotomy wound                                     |
| 150308. Dehiscence of median sternotomy wound                                    |
| 150315. Keloid-hypertrophic scar of median sternotomy wound                      |
| 150330. Lateral thoracotomy complication                                         |
| 150332. Infection of lateral thoracotomy wound                                   |
| 150350. Wound infection                                                          |
| 150351. Wound dehiscence                                                         |
| 150352. Mediastinitis                                                            |
| 152420. Postprocedural femoral arterial complication                             |
| 154306. Unplanned reoperation during current admission                           |
| 155000. Cardiac catheterisation complication                                     |
| 155001. Intramyocardial injection of contrast medium                             |
| 155003. Perforation of cardiac chamber-vessel during cardiac catheterisation     |
| 155011. Lost pulse after cardiac catheterisation                                 |
| 155030. Equipment problem during cardiac catheterisation                         |
| 155037. Embolisation of catheter introduced device                               |
| 155040. Failed attempt to implant coil-device during transcatheter intervention  |
| 155060. Complication involving device implantation                               |
| 155070. Complication involving stent                                             |
| 155702. Extracorporeal Membrane Oxygenation (ECMO) circuit complication          |
| 155703. Ventricular assist device complication                                   |
| 155721. Intraaortic balloon pump (IABP) complication                             |
| 155801. Complication related to echocardiographic procedure                      |
| 155900. Medication related complication or error                                 |
| 156002. Arrhythmia following procedure                                           |
| 156738. Wound related complication                                               |
| 157700. Cardiopulmonary bypass complication                                      |
| 158000. General systemic complication of cardiac procedure                       |
| 158001. Postprocedural metabolic derangement                                     |

|                                                                                |
|--------------------------------------------------------------------------------|
| 158005. Postprocedural septicaemia                                             |
| 158006. Capillary leak syndrome                                                |
| 158015. Postprocedural acidosis                                                |
| 158016. Multiple organ dysfunction syndrome (MODS)                             |
| 158019. Systemic inflammatory response syndrome (SIRS)                         |
| 158020. Respiratory complication after cardiac procedure                       |
| 158021. Postprocedural pulmonary infection                                     |
| 158022. Postprocedural pulmonary hypertensive crises                           |
| 158029. Postprocedural Acute Respiratory Distress Syndrome (ARDS)              |
| 158031. Postprocedural lung collapse (atelectasis)                             |
| 158032. Postprocedural requirement for mechanical respiratory support > 7 days |
| 158033. Postprocedural requirement for reintubation                            |
| 158050. Postprocedural pleural effusion                                        |
| 158051. Postprocedural right pleural effusion                                  |
| 158052. Postprocedural left pleural effusion                                   |
| 158055. Postprocedural chylothorax                                             |
| 158056. Postprocedural haemothorax                                             |
| 158061. Pleural effusion requiring drainage                                    |
| 158062. Postprocedural pneumothorax                                            |
| 158070. Postprocedural complication involving tracheo-bronchial tree           |
| 158086. Postprocedural requirement for tracheostomy                            |
| 158087. Postprocedural bronchial compression                                   |
| 158090. Intraprocedural phrenic nerve injury (paralysed diaphragm)             |
| 158093. Intraprocedural recurrent laryngeal nerve injury (palsy)               |
| 158094. Postprocedural Horner's syndrome                                       |
| 158200. Postprocedural renal failure                                           |
| 158206. Renal failure requiring temporary dialysis                             |
| 158207. Renal failure requiring permanent dialysis                             |
| 158221. Postprocedural gastrointestinal bleeding                               |
| 158223. Postprocedural inability to sustain gastric feeding                    |
| 158228. Postprocedural intestinal obstruction                                  |
| 158229. Postprocedural peritonitis                                             |
| 158230. Postprocedural necrotising enterocolitis                               |
| 158232. Pseudomembranous colitis                                               |
| 158233. Postprocedural protein losing enteropathy                              |
| 158238. Postprocedural feeding difficulties                                    |
| 158243. Postprocedural hepatic impairment                                      |
| 158247. Postprocedural acute pancreatitis                                      |
| 158250. Neurological complication after cardiac procedure                      |
| 158251. Postprocedural generalised seizures                                    |
| 158253. Postprocedural temporary neurological impairment                       |
| 158257. Postprocedural permanent neurological impairment                       |
| 158264. Postprocedural brain death                                             |
| 158266. Postprocedural cerebral abscess                                        |
| 158267. Postprocedural new onset seizures                                      |
| 158268. Postprocedural neurological impairment persisting at discharge         |
| 158281. Postprocedural cerebral abnormality on imaging                         |
| 158800. Vascular line (access) related complication                            |
| 159001. Postprocedural complication                                            |
| 159014. Procedure related complication                                         |
| 159020. Complication during period of anaesthetic care                         |
| 165020. Complication following respiratory tract stent implantation            |
| 101824. Postmyocardial infarction complication                                 |

## Data S2. Supplemental Results

### Summary of results from descriptive and univariate analyses

Ethnic group was not available from PICA Net for 1,703 children in the final dataset. Of these, the NCHDA ethnic code was used to assign white (n=1,001), Asian (n=243) or black (n=113). Excluding records without PICA Net-derived ethnicity from the analyses did not significantly affect the results. A total of 528 children had missing or anomalous weight-for-age (assumed erroneous and treated as missing). The variable with the markedly highest level of missing data (n=2,101 (27.5%)) was prematurity (yes/no): sensitivity analysis comparing models with and without prematurity showed a marginally better fit if it was included and very little difference in the odds ratio coefficients for all other factors.

The observed numbers of patients and rate of adverse events and fatal adverse events only for all candidate risk factors are shown below along with the results of the univariate analysis.

The relationship between length of stay and both outcomes was non-linear and the fractional polynomial transformation was used in the subsequent risk model development analyses, whilst for age we used a log transformation. The relationship between weight-for-age and each outcome did not depart significantly from linearity. We used a multi-degree of freedom test for ethnicity, with results for fatal adverse events and all adverse events of  $p = 0.003$  and  $p = 0.0001$  respectively.

| Patient variable         |            |              | Num. (%) overall | Fatal adverse events only |                         | All adverse events |                         |
|--------------------------|------------|--------------|------------------|---------------------------|-------------------------|--------------------|-------------------------|
|                          |            |              |                  | Num. (%)                  | Univariate OR (p-value) | Num. (%)           | Univariate OR (p-value) |
| Non-medical              |            |              |                  |                           |                         |                    |                         |
| Deprivation              |            |              |                  |                           |                         |                    |                         |
|                          | 1 – most   | 2,205 (28.9) | 79 (3.6)         | 1                         | 157 (7.1)               | 1                  |                         |
|                          | 2          | 1,563 (20.5) | 51 (3.3)         | 0.91 (0.60)               | 104 (6.7)               | 0.93 (0.58)        |                         |
|                          | 3          | 1,242 (16.3) | 41 (3.3)         | 0.92 (0.66)               | 77 (6.2)                | 0.86 (0.30)        |                         |
|                          | 4          | 1,078 (14.1) | 38 (3.5)         | 0.98 (0.93)               | 79 (7.3)                | 1.03 (0.83)        |                         |
|                          | 5 – least  | 1,085 (14.2) | 23 (2.1)         | 0.58 (0.02)               | 64 (5.9)                | 0.82 (0.19)        |                         |
|                          | Missing    | 470 (6.2)    | -                | -                         | -                       | -                  |                         |
| Ethnicity                |            |              |                  |                           |                         |                    |                         |
|                          | White      | 5,728 (75.0) | 166 (2.9)        | 1                         | 348 (6.1)               | 1                  |                         |
|                          | Mixed      | 196 (2.6)    | 4 (2.0)          | 0.70 (0.48)               | 9 (4.6)                 | 0.74 (0.39)        |                         |
|                          | Asian      | 867 (11.3)   | 38 (4.4)         | 1.54 (0.02)               | 73 (8.4)                | 1.42 (< 0.01)      |                         |
|                          | Black      | 345 (4.5)    | 12 (3.5)         | 1.21 (0.54)               | 34 (9.9)                | 1.69 (< 0.01)      |                         |
|                          | Chinese    | 28 (0.4)     | 3 (3.6)          | 1.24 (0.83)               | 1 (3.6)                 | 0.57 (0.59)        |                         |
|                          | Other      | 133 (1.7)    | 12 (9.0)         | 3.32 (< 0.001)            | 19 (14.3)               | 2.58 (< 0.001)     |                         |
|                          | Not stated | 346 (4.5)    | 13 (3.8)         | 1.31 (0.36)               | 30 (8.7)                | 1.47 (0.05)        |                         |
| Pre-operative            |            |              |                  |                           |                         |                    |                         |
| Cardiac diagnosis group  |            |              |                  |                           |                         |                    |                         |
|                          | VSD        | 1348 (17.6)  | 25 (1.9)         | 1                         | 60 (4.5)                | 1                  |                         |
|                          | HLHS       | 390 (5.1)    | 48 (12.3)        | 7.43 (< 0.001)            | 70 (18.0)               | 4.70 (< 0.001)     |                         |
|                          | UVH/PA     | 531 (7.0)    | 41 (7.7)         | 4.43 (< 0.001)            | 73 (13.8)               | 3.42 (< 0.001)     |                         |
|                          | Other      | 5374 (70.3)  | 132 (2.5)        | 1.33 (0.19)               | 311 (5.8)               | 1.32 (0.06)        |                         |
| Acquired diagnosis       |            |              |                  |                           |                         |                    |                         |
|                          | Yes        | 479 (6.3)    | 25 (5.2)         | 1.73 (0.01)               | 57 (11.9)               | 1.98 (< 0.001)     |                         |
|                          | No         | 7164 (93.7)  | 221 (3.1)        | 1                         | 457 (6.4)               | 1                  |                         |
| Specific procedure group |            |              |                  |                           |                         |                    |                         |

|                                     |                                               |             |           |                |            |                |
|-------------------------------------|-----------------------------------------------|-------------|-----------|----------------|------------|----------------|
| Congenital anomaly                  | Corrective                                    | 4973 (65.1) | 86 (1.7)  | 1              | 219 (4.4)  | 1              |
|                                     | Palliative                                    | 1629 (21.3) | 119 (7.3) | 4.48 (< 0.001) | 205 (12.6) | 3.13 (< 0.001) |
|                                     | Ungrouped                                     | 1041 (13.6) | 41 (3.9)  | 2.33 (< 0.001) | 90 (8.7)   | 2.05 (< 0.001) |
| Neurodevelopment condition          | Yes                                           | 1608 (21.0) | 90 (5.6)  | 2.23 (< 0.001) | 209 (13.0) | 2.81 (< 0.001) |
|                                     | No                                            | 6035 (79.0) | 156 (2.6) | 1              | 305 (5.1)  | 1              |
| Prematurity                         | Yes                                           | 307 (4.0)   | 27 (8.8)  | 3.13 (< 0.001) | 75 (24.4)  | 5.08 (< 0.001) |
|                                     | No                                            | 7336 (96.0) | 219 (3.0) | 1              | 439 (6.0)  | 1              |
| Gender                              | Yes                                           | 828 (10.8)  | 44 (5.3)  | 1.59 (< 0.01)  | 93 (11.2)  | 1.63 (< 0.001) |
|                                     | No                                            | 4714 (61.7) | 161 (3.4) | 1              | 340 (7.2)  | 1              |
|                                     | Missing                                       | 2101 (27.5) | -         | -              | -          | -              |
| Age at index procedure (continuous) | Male                                          | 4232 (55.4) | 114 (3.4) | 1              | 302 (7.1)  | 1              |
|                                     | Female                                        | 3410 (44.6) | 102 (3.0) | 0.88 (0.31)    | 212 (6.2)  | 0.86 (0.11)    |
|                                     | Not known                                     | 1 (0.0)     | -         | -              | -          | -              |
| Weight-for-age Z-score (continuous) | Med. 64 days<br>IQR (11,153)<br>Missing = 0   |             | Not shown | 0.99 (< 0.001) | Not shown  | 0.99 (< 0.001) |
| Antenatal diagnosis                 | Med. -1.7<br>IQR (-2.8,-0.6)<br>Missing = 528 |             | Not shown | 1.02 (0.69) *  | Not shown  | 0.95 (0.13) *  |
| Clinical deterioration              | Yes                                           | 2146 (8.1)  | 105 (4.9) | 2.04 (< 0.001) | 219 (10.2) | 2.03 (< 0.001) |
|                                     | No                                            | 5046 (66.0) | 124 (2.5) | 1              | 268 (5.3)  | 1              |
|                                     | Missing                                       | 451 (5.9)   | -         | -              | -          | -              |
| Post-operative                      | Yes                                           | 1469 (19.2) | 85 (5.8)  | 2.29 (< 0.001) | 154 (10.5) | 1.89 (< 0.001) |
|                                     | No                                            | 6174 (80.8) | 161 (2.6) | 1              | 36 (0.8)   | 1              |
| Length of stay (continuous)         | Med. 10 days<br>IQR (7, 17)<br>Missing = 0    |             | Not shown | (< 0.001)      | Not shown  | (< 0.001)      |
| Additional surgical procedures      | Yes                                           | 414 (5.4)   | 23 (5.6)  | 1.85 (< 0.01)  | 54 (13.0)  | 2.21 (< 0.001) |
|                                     | No                                            | 7229 (94.6) | 223 (3.1) | 1              | 460 (6.4)  | 1              |
| Additional catheter procedures      | Yes                                           | 577 (7.6)   | 16 (2.8)  | 0.85 (0.53)    | 32 (5.6)   | 0.80 (0.24)    |
|                                     | No                                            | 7066 (92.4) | 230 (3.3) | 1              | 482 (6.8)  | 1              |
| Need for renal support              | Yes                                           | 522 (6.8)   | 31 (5.9)  | 1.99 (<0.01)   | 57 (10.9)  | 1.82 (< 0.001) |
|                                     | No                                            | 6721 (87.9) | 207 (3.1) | 1              | 425 (6.3)  | 1              |
|                                     | Missing                                       | 400 (5.2)   | -         | -              | -          | -              |
| Need for ECMO                       | Yes                                           | 64 (0.8)    | 5 (7.8)   | 2.53 (0.05)    | 9 (14.1)   | 2.32 (0.02)    |
|                                     | No                                            | 7290 (95.4) | 236 (3.2) | 1              | 480 (6.6)  | 1              |
|                                     | Missing                                       | 289 (3.8)   | -         | -              | -          | -              |
| Acquired comorbidity                | Yes                                           | 1481 (19.4) | 84 (5.7)  | 2.19 (< 0.001) | 165 (11.1) | 2.15 (< 0.001) |
|                                     | No                                            | 5918 (77.4) | 158 (2.7) | 1              | 326 (5.5)  | 1              |
|                                     | Missing                                       | 244 (3.2)   | -         | -              | -          | -              |

|                       |         |             |           |                |           |                |
|-----------------------|---------|-------------|-----------|----------------|-----------|----------------|
| Adverse event in PICU | Yes     | 634 (8.3)   | 47 (7.4)  | 2.70 (< 0.001) | 89 (14.0) | 2.58 (< 0.001) |
|                       | No      | 6765 (88.5) | 195 (2.9) | 1              | 402 (5.9) | 1              |
|                       | Missing | 244 (3.2)   | -         | -              | -         | -              |
| Post-op morbidity     | Yes     | 113 (1.5)   | 9 (8.0)   | 2.66 (< 0.01)  | 17 (15.0) | 2.51 (< 0.01)  |
|                       | No      | 7530 (98.5) | 237 (3.2) | 1              | 497 (6.6) | 1              |

PICU = paediatric intensive care unit; IQR = interquartile range; ECMO = extracorporeal membrane oxygenation; HLHS = hypoplastic left heart syndrome; UVH = functionally univentricular heart; PA = pulmonary atresia; VSD = Ventricular septal defect.

\* Weight-for-age z-score (continuous) showed no univariate association with either outcome but was nonetheless taken forward to the multivariable analyses.

Details regarding the categorization of age at procedure, weight-for-age z-score and length of stay are presented below: these were initially continuous variables that were categorised due to considerations of potential model usability and clinical face validity. The observed numbers of patients and rate of fatal adverse events and all adverse events in the dataset in each category are shown for each categorized variable.

|                        | Num. (%)<br>overall | Num. (%)<br>Fatal adverse<br>events only | Num. (%) All<br>adverse events |
|------------------------|---------------------|------------------------------------------|--------------------------------|
| Age at index procedure |                     |                                          |                                |
| > 3 months old         | 3202 (41.9)         | 55 (1.7)                                 | 129 (4.0)                      |
| 1-2 months old         | 1427 (18.7)         | 45 (3.2)                                 | 110 (7.7)                      |
| 10-30 days             | 1114 (14.6)         | 43 (3.9)                                 | 90 (8.1)                       |
| 0-10 days old          | 1900 (24.9)         | 103 (5.4)                                | 185 (9.7)                      |
| Weight-for-age z-score |                     |                                          |                                |
| >-2SD                  | 4064 (53.2)         | 128 (3.1)                                | 243 (6.0)                      |
| -2 to -4 SD            | 2467 (32.3)         | 71 (2.9)                                 | 168 (6.8)                      |
| <-4SD                  | 584 (7.6)           | 19 (3.3)                                 | 50 (8.6)                       |
| Missing                | 528 (6.9)           | 28 (5.3)                                 | 53 (10.0)                      |
| Length of stay         |                     |                                          |                                |
| 0-7 days               | 2564 (33.5)         | 35 (1.4)                                 | 84 (3.3)                       |
| 7-30 days              | 4327 (56.6)         | 146 (3.4)                                | 302 (7.0)                      |
| > 1 month              | 752 (9.8)           | 65 (8.6)                                 | 128 (17.0)                     |

## Multiple imputation results

For both outcomes there was very little difference in the significance of risk factors between the imputed data sets; there was a clear set of significant factors ( $p < 0.01$ ) with an inclusion frequency of 100% and a clear set of factors that did not reach statistical significance with an inclusion frequency of 0%. For fatal adverse events only there were two factors (prematurity and acquired diagnosis) and for all adverse events three factors (prematurity, antenatal diagnosis and clinical deterioration) that were borderline significant, with an inclusion frequency of approximately 50%. These borderline risk factors were investigated further along with the set of significant risk factors and only prematurity remained statistically significant. The Multiple Imputation suite of programs in Stata was used to conduct the imputation analysis.

## Continuous logistic regression models

Details of the continuous regression model for fatal adverse events only (death within 1-year following discharge from the index admission and not during a planned admission) are shown below. For each patient variable the number (percentage) of fatal adverse events, multivariable odds ratios, standard errors and 95% confidence intervals are presented and the reference category indicated. The overall number (percentage) of patients within each category for a given patient variable is also noted. HLHS = hypoplastic left heart syndrome; UVH = functionally univentricular heart; PA+IVS = pulmonary atresia with an intact ventricular septum; VSD = ventricular septal defect.  
† Log transformation ‡ Fractional polynomial transformation.

| Patient variable         |                             | Overall<br>number (%) | Number (%) fatal<br>adverse events | OR                 | S.E. | 95% CI |       |
|--------------------------|-----------------------------|-----------------------|------------------------------------|--------------------|------|--------|-------|
| Ethnicity                |                             |                       |                                    |                    |      |        |       |
|                          | White                       | 5,728 (75.0)          | 166 (2.9)                          | Reference category |      |        |       |
|                          | Mixed                       | 196 (2.6)             | 4 (2.0)                            | 0.69               | 0.36 | 0.25   | 1.91  |
|                          | Asian                       | 867 (11.3)            | 38 (4.4)                           | 1.38               | 0.26 | 0.95   | 2.01  |
|                          | Black                       | 345 (4.5)             | 12 (3.5)                           | 0.98               | 0.31 | 0.53   | 1.83  |
|                          | Chinese                     | 28 (0.4)              | 3 (3.6)                            | 1.61               | 1.68 | 0.21   | 12.46 |
|                          | Other                       | 133 (1.7)             | 12 (9.0)                           | 2.97               | 0.99 | 1.54   | 5.73  |
|                          | Not stated                  | 346 (4.5)             | 13 (3.8)                           | 1.49               | 0.46 | 0.82   | 2.71  |
| Cardiac diagnosis group  |                             |                       |                                    |                    |      |        |       |
|                          | VSD                         | 1348 (17.6)           | 25 (1.9)                           | Reference category |      |        |       |
|                          | HLHS                        | 390 (5.1)             | 48 (12.3)                          | 2.70               | 0.86 | 1.45   | 5.04  |
|                          | UVH or PA+IVS               | 531 (7.0)             | 41 (7.7)                           | 2.29               | 0.68 | 1.28   | 4.11  |
|                          | Other                       | 5374 (70.3)           | 132 (2.5)                          | 1.14               | 0.27 | 0.72   | 1.80  |
| Specific procedure group |                             |                       |                                    |                    |      |        |       |
|                          | Corrective                  | 4973 (65.1)           | 86 (1.7)                           | Reference category |      |        |       |
|                          | Palliative                  | 1629 (21.3)           | 119 (7.3)                          | 2.15               | 0.39 | 1.51   | 3.06  |
|                          | Ungrouped                   | 1041 (13.6)           | 41 (3.9)                           | 1.78               | 0.36 | 1.20   | 2.64  |
| Congenital anomaly       |                             |                       |                                    |                    |      |        |       |
|                          | No                          | 6035 (79.0)           | 156 (2.6)                          | Reference category |      |        |       |
|                          | Yes                         | 1608 (21.0)           | 90 (5.6)                           | 2.29               | 0.35 | 1.70   | 3.09  |
| Prematurity              |                             |                       |                                    |                    |      |        |       |
|                          | No                          | 4714 (61.7)           | 161 (3.4)                          | Reference category |      |        |       |
|                          | Yes                         | 828 (10.8)            | 44 (5.3)                           | 1.55               | 0.28 | 1.09   | 2.20  |
| Clinical deterioration   |                             |                       |                                    |                    |      |        |       |
|                          | No                          | 6174 (80.8)           | 161 (2.6)                          | Reference category |      |        |       |
|                          | Yes                         | 1469 (19.2)           | 85 (5.8)                           | 1.59               | 0.23 | 1.19   | 2.12  |
| Age at index procedure†  |                             |                       |                                    |                    |      |        |       |
|                          |                             | -                     | -                                  | 0.77               | 0.05 | 0.68   | 0.87  |
| Weight-for-age z-score   |                             |                       |                                    |                    |      |        |       |
|                          |                             | -                     | -                                  | 0.83               | 0.05 | 0.74   | 0.92  |
| Index length of stay‡    |                             |                       |                                    |                    |      |        |       |
|                          | First degree of polynomial  | -                     | -                                  | 3239               | 4361 | 231    | 45332 |
|                          | Second degree of polynomial | -                     | -                                  | 0.00               | 0.00 | 0.00   | 0.00  |

Details of the continuous regression model for all adverse events (either death or an emergency unplanned readmission to PICU within 1-year following discharge from the index admission) are shown below. For each patient variable the number (percentage) of adverse events, the multivariable odds ratios, standard errors and 95% confidence intervals are presented and the reference category indicated. The overall number (percentage) of patients within each category for a given patient variable is also noted.

HLHS = hypoplastic left heart syndrome; UVH = functionally univentricular heart; PA+IVS = pulmonary atresia with an intact ventricular septum; VSD = ventricular septal defect.

† Log transformation ‡ Fractional polynomial transformation.

| Patient variable           |                             | Overall<br>number<br>(%) | Number (%)<br>adverse events | OR                 | S.E. | 95% CI |       |
|----------------------------|-----------------------------|--------------------------|------------------------------|--------------------|------|--------|-------|
| Ethnicity                  |                             |                          |                              |                    |      |        |       |
|                            | White                       | 5,728 (75.0)             | 348 (6.1)                    | Reference category |      |        |       |
|                            | Mixed                       | 196 (2.6)                | 9 (4.6)                      | 0.64               | 0.23 | 0.32   | 1.31  |
|                            | Asian                       | 867 (11.3)               | 73 (8.4)                     | 1.22               | 0.18 | 0.92   | 1.62  |
|                            | Black                       | 345 (4.5)                | 34 (9.9)                     | 1.40               | 0.29 | 0.94   | 2.09  |
|                            | Chinese                     | 28 (0.4)                 | 1 (3.6)                      | 0.70               | 0.72 | 0.09   | 5.32  |
|                            | Other                       | 133 (1.7)                | 19 (14.3)                    | 2.52               | 0.68 | 1.48   | 4.29  |
|                            | Not stated                  | 346 (4.5)                | 30 (8.7)                     | 1.71               | 0.36 | 1.13   | 2.58  |
| Cardiac diagnosis group    |                             |                          |                              |                    |      |        |       |
|                            | VSD                         | 1348 (17.6)              | 60 (4.5)                     | Reference category |      |        |       |
|                            | HLHS                        | 390 (5.1)                | 70 (18.0)                    | 2.08               | 0.49 | 1.31   | 3.30  |
|                            | UVH or PA+IVS               | 531 (7.0)                | 73 (13.8)                    | 2.06               | 0.44 | 1.35   | 3.14  |
|                            | Other                       | 5374 (70.3)              | 311 (5.8)                    | 1.18               | 0.19 | 0.87   | 1.61  |
| Specific procedure group   |                             |                          |                              |                    |      |        |       |
|                            | Corrective                  | 4973 (65.1)              | 219 (4.4)                    | Reference category |      |        |       |
|                            | Palliative                  | 1629 (21.3)              | 205 (12.6)                   | 1.72               | 0.22 | 1.34   | 2.22  |
|                            | Ungrouped                   | 1041 (13.6)              | 90 (8.7)                     | 1.62               | 0.22 | 1.24   | 2.13  |
| Congenital anomaly         |                             |                          |                              |                    |      |        |       |
|                            | No                          | 6035 (79.0)              | 305 (5.1)                    | Reference category |      |        |       |
|                            | Yes                         | 1608 (21.0)              | 209 (13.0)                   | 2.62               | 0.28 | 2.12   | 3.24  |
| Neurodevelopment condition |                             |                          |                              |                    |      |        |       |
|                            | No                          | 7336 (96.0)              | 439 (6.0)                    | Reference category |      |        |       |
|                            | Yes                         | 307 (4.0)                | 75 (24.4)                    | 2.71               | 0.43 | 1.99   | 3.69  |
| Prematurity                |                             |                          |                              |                    |      |        |       |
|                            | No                          | 4714 (61.7)              | 340 (7.2)                    | Reference category |      |        |       |
|                            | Yes                         | 828 (10.8)               | 93 (11.2)                    | 1.50               | 0.20 | 1.15   | 1.95  |
| Acquired diagnosis         |                             |                          |                              |                    |      |        |       |
|                            | No                          | 7164 (93.7)              | 457 (6.4)                    | Reference category |      |        |       |
|                            | Yes                         | 479 (6.3)                | 57 (11.9)                    | 1.76               | 0.28 | 1.28   | 2.41  |
| Age at index procedure†    |                             |                          |                              |                    |      |        |       |
|                            |                             | -                        | -                            | 0.77               | 0.03 | 0.70   | 0.83  |
| Weight-for-age z-score     |                             |                          |                              |                    |      |        |       |
|                            |                             | -                        | -                            | 0.83               | 0.03 | 0.77   | 0.90  |
| Index length of stay‡      |                             |                          |                              |                    |      |        |       |
|                            | First degree of polynomial  | -                        | -                            | 2254               | 2151 | 347    | 14633 |
|                            | Second degree of polynomial | -                        | -                            | 0.00               | 0.00 | 0.00   | 0.00  |



## Supplemental References

1. IPCCC (2012) International Paediatric and Congenital Cardiac Code (IPCCC) Home Page. Available: [www.ipccc.net](http://www.ipccc.net). Accessed 12 April 2012. 2. Harrell FE, Lee KL, Califf RM, Pryor DB, Rosati RA (1984) Regression modelling strategies for improved prognostic prediction. *Stat Med* 3: 143–152.
3. LHO (2011) English Indices of Deprivation 2010 - deprivation category lookups and average scores for higher geographies. Available: <http://www.apho.org.uk/resource/view.aspx?RID=111277>. Accessed 13 February 2015.
4. Office for National Statistics (2011) Guidance and methodology: Ethnic group. Available: <http://ons.gov.uk/ons/guide-method/measuring-equality/equality/ethnic-nat-identity-religion/ethnic-group/index.html#1>. Accessed 13 February 2015.
5. Brown K, Wray J, Knowles R, Crowe S, Tregay J, et al. (2015) Project grant report: Infant deaths in the UK community following successful cardiac surgery - building the evidence base for optimal surveillance.
6. Brown KL, Crowe S, Pagel C, Bull C, Muthialu N, et al. (2013) Use of diagnostic information submitted to the United Kingdom Central Cardiac Audit Database: development of categorisation and allocation algorithms. *Cardiol Young* 23: 491–498. doi:10.1017/S1047951112001369.
7. Health and Social Care Information Centre (n.d.) Read codes. Available: <https://isd.hscic.gov.uk/trud3/user/guest/group/0/home>. Accessed 18 December 2014.
